# Supplementary material for: Climate-Smart Livestock Systems: An Assessment of Carbon Stocks and GHG Emissions in Nicaragua
Source: PLoS One. 2016 Dec 28;11(12):e0167949. doi: 10.1371/journal.pone.0167949 (PMC5193326; doi:10.1371/journal.pone.0167949)
Supplement: S1 Fig — Location of the 30 farms, of which 16 were classified as one of the three typologies: conventional subsistence, conventional market and climate smart. Reprinted from [39] under a CC BY license, with permission from [CGIAR-CSI], original copyright [2008]. (XLSX) [file pone.0167949.s001.xlsx]

## Sheet: GPS_24062015
TYPE	ID	DATE	USER	COORDS	ELEV	LAT	LONG
Waypoint	Finca1	28-OCT-14 6:49:37AM	User Waypoint	N12 49.253 W85 26.036	275 m	12.8209	-85.4339
Waypoint	Finca2	28-OCT-14 8:20:07AM	User Waypoint	N12 48.165 W85 25.503	302 m	12.8027	-85.425
Waypoint	Finca3	28-OCT-14 11:18:20AM	User Waypoint	N12 47.615 W85 18.687	353 m	12.7936	-85.3114
Waypoint	Finca4	28-OCT-14 12:19:20PM	User Waypoint	N12 47.274 W85 18.492	341 m	12.7879	-85.3082
Waypoint	Finca5	28-OCT-14 2:59:08PM	User Waypoint	N12 47.264 W85 18.550	325 m	12.7877	-85.3092
Waypoint	Finca6	28-OCT-14 1:21:57PM	User Waypoint	N12 47.082 W85 18.590	334 m	12.7847	-85.3098
Waypoint	Finca7	28-OCT-14 2:12:21PM	User Waypoint	N12 47.057 W85 18.973	315 m	12.7843	-85.3162
Waypoint	Finca8	28-OCT-14 3:54:00PM	User Waypoint	N12 47.471 W85 18.414	328 m	12.7912	-85.3069
Waypoint	Finca9	29-OCT-14 7:56:03AM	User Waypoint	N12 47.609 W85 18.843	292 m	12.7935	-85.314
Waypoint	Finca10	29-OCT-14 9:10:57AM	User Waypoint	N12 48.089 W85 18.553	325 m	12.8015	-85.3092
Waypoint	Finca11	29-OCT-14 11:23:06AM	User Waypoint	N12 44.894 W85 15.918	457 m	12.7482	-85.2653
Waypoint	Finca12	29-OCT-14 11:56:42AM	User Waypoint	N12 47.209 W85 17.924	353 m	12.7868	-85.2987
Waypoint	Finca13	29-OCT-14 12:43:31PM	User Waypoint	N12 47.282 W85 17.817	326 m	12.788	-85.2969
Waypoint	Finca14	29-OCT-14 2:04:25PM	User Waypoint	N12 47.675 W85 18.928	327 m	12.7946	-85.3155
Waypoint	Finca15	29-OCT-14 3:24:33PM	User Waypoint	N12 47.535 W85 22.476	356 m	12.7922	-85.3746
Waypoint	Finca16	30-OCT-14 8:48:49AM	User Waypoint	N12 47.727 W85 24.978	290 m	12.7955	-85.4163
Waypoint	Finca17	30-OCT-14 10:24:57AM	User Waypoint	N12 47.186 W85 28.266	273 m	12.7864	-85.4711
Waypoint	Finca18	30-OCT-14 11:15:31AM	User Waypoint	N12 46.954 W85 28.847	280 m	12.7826	-85.4808
Waypoint	Finca19	30-OCT-14 12:53:26PM	User Waypoint	N12 48.930 W85 28.580	307 m	12.8155	-85.4763
Waypoint	Finca20	05-NOV-14 2:31:22PM	User Waypoint	N12 48.791 W85 25.668	319 m	12.8132	-85.4278
Waypoint	Finca21	04-NOV-14 8:01:46AM	User Waypoint	N13 00.115 W85 34.303	571 m	13.0019	-85.5717
Waypoint	Finca22	04-NOV-14 9:06:10AM	User Waypoint	N13 00.498 W85 33.903	611 m	13.0083	-85.565
Waypoint	Finca23	04-NOV-14 10:09:15AM	User Waypoint	N12 59.944 W85 33.377	493 m	12.9991	-85.5563
Waypoint	Finca24	04-NOV-14 11:36:29AM	User Waypoint	N12 58.858 W85 33.395	634 m	12.981	-85.5566
Waypoint	Finca25	04-NOV-14 1:02:27PM	User Waypoint	N12 57.930 W85 33.907	480 m	12.9655	-85.5651
Waypoint	Finca26	04-NOV-14 2:18:18PM	User Waypoint	N12 56.000 W85 33.996	644 m	12.9333	-85.5666
Waypoint	Finca27	05-NOV-14 7:07:09AM	User Waypoint	N12 56.686 W85 33.924	651 m	12.9448	-85.5654
Waypoint	Finca28	05-NOV-14 8:40:00AM	User Waypoint	N12 58.719 W85 29.912	681 m	12.9787	-85.4985
Waypoint	Finca29	05-NOV-14 9:37:08AM	User Waypoint	N12 58.910 W85 29.272	547 m	12.9818	-85.4879
Waypoint	Finca30	05-NOV-14 10:49:04AM	User Waypoint	N12 59.798 W85 28.359	572 m	12.9966	-85.4727
Waypoint	2	28-ENE-14 9:34:55AM	User Waypoint	N12 48.421 W85 25.903	290 m	12.807	-85.4317
Waypoint	3	28-ENE-14 9:38:03AM	User Waypoint	N12 48.421 W85 25.905	291 m	12.807	-85.4317
Waypoint	4	28-ENE-14 9:38:03AM	User Waypoint	N12 48.421 W85 25.905	291 m	12.807	-85.4317
Waypoint	5	12-FEB-14 10:45:51AM	User Waypoint	N12 48.934 W85 28.579	299 m	12.8156	-85.4763
Waypoint	6	12-FEB-14 10:46:01AM	User Waypoint	N12 48.934 W85 28.579	300 m	12.8156	-85.4763
Waypoint	7	12-FEB-14 10:46:02AM	User Waypoint	N12 48.934 W85 28.579	300 m	12.8156	-85.4763
Waypoint	8	28-MAR-14 6:43:03AM	User Waypoint	N12 50.422 W85 31.198	274 m	12.8404	-85.52
Waypoint	9	28-MAR-14 6:47:36AM	User Waypoint	N12 50.382 W85 31.009	265 m	12.8397	-85.5168
Waypoint	10	28-MAR-14 6:53:58AM	User Waypoint	N12 50.300 W85 30.726	279 m	12.8383	-85.5121
Waypoint	11	28-MAR-14 7:02:59AM	User Waypoint	N12 50.295 W85 30.324	281 m	12.8383	-85.5054
Waypoint	12	28-MAR-14 7:07:28AM	User Waypoint	N12 50.231 W85 30.122	292 m	12.8372	-85.502
Waypoint	13	28-MAR-14 7:11:04AM	User Waypoint	N12 50.206 W85 29.946	285 m	12.8368	-85.4991
Waypoint	14	28-MAR-14 7:16:12AM	User Waypoint	N12 50.037 W85 29.775	290 m	12.8339	-85.4963
Waypoint	15	28-MAR-14 7:24:03AM	User Waypoint	N12 49.761 W85 29.530	313 m	12.8293	-85.4922
Waypoint	16	28-MAR-14 7:29:41AM	User Waypoint	N12 49.684 W85 29.278	328 m	12.8281	-85.488
Waypoint	17	28-MAR-14 7:35:59AM	User Waypoint	N12 49.527 W85 29.022	321 m	12.8255	-85.4837
Waypoint	18	25-MAY-14 7:55:41AM	User Waypoint	N12 50.150 W85 25.263	319 m	12.8358	-85.421
Waypoint	19	25-MAY-14 7:56:04AM	User Waypoint	N12 50.150 W85 25.263	318 m	12.8358	-85.421
Waypoint	20	25-MAY-14 8:05:52AM	User Waypoint	N12 50.147 W85 25.271	316 m	12.8358	-85.4212
Waypoint	21	25-MAY-14 8:07:17AM	User Waypoint	N12 50.148 W85 25.267	316 m	12.8358	-85.4211
Waypoint	22	25-MAY-14 8:08:32AM	User Waypoint	N12 50.146 W85 25.265		12.8358	-85.4211
Waypoint	23	25-MAY-14 8:12:12AM	User Waypoint	N12 50.138 W85 25.281	312 m	12.8356	-85.4214
Waypoint	24	25-MAY-14 8:12:20AM	User Waypoint	N12 50.138 W85 25.281	312 m	12.8356	-85.4214
Waypoint	25	25-MAY-14 8:27:40AM	User Waypoint	N12 50.325 W85 25.603	312 m	12.8387	-85.4267
Waypoint	26	25-MAY-14 8:33:48AM	User Waypoint	N12 50.307 W85 25.765	284 m	12.8384	-85.4294
Waypoint	27	25-MAY-14 8:45:23AM	User Waypoint	N12 50.243 W85 25.632	301 m	12.8374	-85.4272
Waypoint	28	25-MAY-14 8:47:06AM	User Waypoint	N12 50.293 W85 25.616	302 m	12.8382	-85.4269
Waypoint	29	25-MAY-14 8:48:30AM	User Waypoint	N12 50.326 W85 25.601	313 m	12.8388	-85.4267
Waypoint	30	25-MAY-14 8:50:23AM	User Waypoint	N12 50.372 W85 25.579	319 m	12.8395	-85.4263
Waypoint	31	25-MAY-14 8:52:16AM	User Waypoint	N12 50.421 W85 25.576	314 m	12.8404	-85.4263
Waypoint	32	25-MAY-14 8:53:22AM	User Waypoint	N12 50.434 W85 25.578	314 m	12.8406	-85.4263
Waypoint	33	25-MAY-14 8:57:01AM	User Waypoint	N12 50.503 W85 25.572	288 m	12.8417	-85.4262
Waypoint	34	25-MAY-14 9:08:13AM	User Waypoint	N12 50.526 W85 25.550	276 m	12.8421	-85.4258
Waypoint	35	25-MAY-14 9:09:03AM	User Waypoint	N12 49.856 W85 25.513		12.8309	-85.4252
Waypoint	36	25-MAY-14 9:10:40AM	User Waypoint	N12 50.548 W85 25.524	275 m	12.8425	-85.4254
Waypoint	37	25-MAY-14 9:12:22AM	User Waypoint	N12 50.570 W85 25.503	275 m	12.8428	-85.425
Waypoint	38	25-MAY-14 9:14:23AM	User Waypoint	N12 50.592 W85 25.491	275 m	12.8432	-85.4249
Waypoint	39	25-MAY-14 9:16:23AM	User Waypoint	N12 50.618 W85 25.471	280 m	12.8436	-85.4245
Waypoint	40	25-MAY-14 9:18:54AM	User Waypoint	N12 50.632 W85 25.437	275 m	12.8439	-85.424
Waypoint	41	25-MAY-14 9:20:24AM	User Waypoint	N12 50.646 W85 25.404	275 m	12.8441	-85.4234
Waypoint	42	25-MAY-14 9:22:30AM	User Waypoint	N12 50.691 W85 25.384	276 m	12.8448	-85.4231
Waypoint	43	25-MAY-14 9:28:04AM	User Waypoint	N12 50.717 W85 25.367	273 m	12.8453	-85.4228
Waypoint	44	25-MAY-14 9:32:01AM	User Waypoint	N12 50.741 W85 25.364	274 m	12.8457	-85.4227
Waypoint	45	25-MAY-14 9:35:16AM	User Waypoint	N12 50.762 W85 25.372	278 m	12.846	-85.4229
Waypoint	46	25-MAY-14 9:36:30AM	User Waypoint	N12 50.769 W85 25.382	285 m	12.8461	-85.423
Waypoint	47	25-MAY-14 9:41:44AM	User Waypoint	N12 50.849 W85 25.467	289 m	12.8475	-85.4244
Waypoint	48	25-MAY-14 9:42:36AM	User Waypoint	N12 50.849 W85 25.467	288 m	12.8475	-85.4244
Waypoint	49	25-MAY-14 9:44:09AM	User Waypoint	N12 50.849 W85 25.467	289 m	12.8475	-85.4244
Waypoint	50	25-MAY-14 9:46:59AM	User Waypoint	N12 50.853 W85 25.468	288 m	12.8476	-85.4245
Waypoint	51	25-MAY-14 9:49:01AM	User Waypoint	N12 50.849 W85 25.467	289 m	12.8475	-85.4244
Waypoint	52	25-MAY-14 9:49:48AM	User Waypoint	N12 50.789 W85 25.416		12.8465	-85.4236
Waypoint	53	25-MAY-14 9:50:05AM	User Waypoint	N12 50.849 W85 25.467	288 m	12.8475	-85.4244
Waypoint	54	25-MAY-14 9:53:30AM	User Waypoint	N12 50.849 W85 25.467	288 m	12.8475	-85.4244
Waypoint	55	25-MAY-14 9:55:26AM	User Waypoint	N12 50.850 W85 25.467	288 m	12.8475	-85.4244
Waypoint	56	25-MAY-14 9:55:38AM	User Waypoint	N12 50.850 W85 25.467	288 m	12.8475	-85.4244
Waypoint	57	25-MAY-14 10:06:29AM	User Waypoint	N12 50.850 W85 25.466	287 m	12.8475	-85.4244
Waypoint	58	25-MAY-14 10:13:19AM	User Waypoint	N12 50.963 W85 25.517	295 m	12.8494	-85.4253
Waypoint	59	25-MAY-14 10:20:47AM	User Waypoint	N12 50.981 W85 25.522	295 m	12.8497	-85.4254
Waypoint	60	25-MAY-14 10:23:44AM	User Waypoint	N12 51.071 W85 25.558	301 m	12.8512	-85.426
Waypoint	61	25-MAY-14 10:40:04AM	User Waypoint	N12 51.074 W85 25.625	384 m	12.8512	-85.4271
Waypoint	62	25-MAY-14 10:42:06AM	User Waypoint	N12 51.075 W85 25.632	388 m	12.8513	-85.4272
Waypoint	63	25-MAY-14 10:45:54AM	User Waypoint	N12 51.122 W85 25.638	380 m	12.852	-85.4273
Waypoint	64	25-MAY-14 10:55:07AM	User Waypoint	N12 51.090 W85 25.779	368 m	12.8515	-85.4296
Waypoint	65	25-MAY-14 10:57:15AM	User Waypoint	N12 51.091 W85 25.788	374 m	12.8515	-85.4298
Waypoint	66	25-MAY-14 10:58:00AM	User Waypoint	N12 51.095 W85 25.803	380 m	12.8516	-85.43
Waypoint	67	25-MAY-14 11:06:10AM	User Waypoint	N12 51.085 W85 25.806	374 m	12.8514	-85.4301
Waypoint	68	25-MAY-14 11:13:17AM	User Waypoint	N12 51.008 W85 25.805	316 m	12.8501	-85.4301
Waypoint	69	25-MAY-14 11:18:31AM	User Waypoint	N12 50.928 W85 25.823	301 m	12.8488	-85.4304
Waypoint	70	25-MAY-14 11:19:39AM	User Waypoint	N12 50.903 W85 25.826	301 m	12.8484	-85.4304
Waypoint	71	25-MAY-14 11:22:26AM	User Waypoint	N12 50.918 W85 25.727	309 m	12.8486	-85.4288
Waypoint	72	25-MAY-14 11:28:00AM	User Waypoint	N12 50.950 W85 25.589	292 m	12.8492	-85.4265
Waypoint	73	26-MAY-14 1:02:51PM	User Waypoint	N12 50.948 W85 25.585	287 m	12.8491	-85.4264
Waypoint	74	11-JUL-14 3:20:44PM	User Waypoint	N12 06.993 W86 15.007	175 m	12.1166	-86.2501
Waypoint	76	13-AGO-14 12:32:19PM	User Waypoint	N12 08.191 W86 08.857	76 m	12.1365	-86.1476
Waypoint	77	13-AGO-14 12:33:34PM	User Waypoint	N12 08.192 W86 08.857	75 m	12.1365	-86.1476
Waypoint	78	13-AGO-14 12:35:57PM	User Waypoint	N12 08.197 W86 08.858	68 m	12.1366	-86.1476
Waypoint	79	28-OCT-14 11:18:02AM	User Waypoint	N12 47.616 W85 18.688	354 m	12.7936	-85.3115
Waypoint	80	29-OCT-14 2:13:11PM	User Waypoint	N12 47.672 W85 19.017	320 m	12.7945	-85.317
Waypoint	81	30-OCT-14 8:59:08AM	User Waypoint	N12 47.662 W85 24.907	293 m	12.7944	-85.4151
Waypoint	82	05-NOV-14 10:49:00AM	User Waypoint	N12 59.798 W85 28.359	572 m	12.9966	-85.4727
Waypoint	83	05-NOV-14 11:27:23AM	User Waypoint	N12 59.893 W85 28.261	602 m	12.9982	-85.471
Waypoint	84	06-NOV-14 12:26:55PM	User Waypoint	N12 49.293 W85 25.867	296 m	12.8216	-85.4311
Waypoint	85	10-NOV-14 2:56:31PM	User Waypoint	N12 49.290 W85 25.868	273 m	12.8215	-85.4311
Waypoint	87	13-NOV-14 2:00:38PM	User Waypoint	N12 48.798 W85 25.669	312 m	12.8133	-85.4278
Waypoint	88	24-NOV-14 12:57:09PM	User Waypoint	N12 55.921 W85 34.069	648 m	12.932	-85.5678
Waypoint	B1	28-OCT-14 7:24:01AM	User Waypoint	N12 49.268 W85 25.847	292 m	12.8211	-85.4308
Waypoint	B17	30-OCT-14 10:33:21AM	User Waypoint	N12 47.156 W85 28.242	267 m	12.7859	-85.4707
Waypoint	B18	30-OCT-14 11:21:39AM	User Waypoint	N12 46.870 W85 28.911	262 m	12.7812	-85.4818
Waypoint	B2	28-OCT-14 9:13:22AM	User Waypoint	N12 48.135 W85 25.343	283 m	12.8023	-85.4224
Waypoint	B22	04-NOV-14 9:27:46AM	User Waypoint	N13 00.610 W85 34.007	647 m	13.0102	-85.5668
Waypoint	B23	04-NOV-14 10:29:43AM	User Waypoint	N13 00.013 W85 33.248	470 m	13.0002	-85.5541
Waypoint	B27	05-NOV-14 7:19:11AM	User Waypoint	N12 56.829 W85 33.917	655 m	12.9472	-85.5653
Waypoint	B30	05-NOV-14 11:22:25AM	User Waypoint	N12 59.888 W85 28.312	592 m	12.9981	-85.4719
Waypoint	Cv1	06-NOV-14 9:13:47AM	User Waypoint	N12 49.273 W85 25.955	255 m	12.8212	-85.4326
Waypoint	Cv10	18-NOV-14 12:05:39PM	User Waypoint	N12 48.086 W85 18.551	338 m	12.8014	-85.3092
Waypoint	Cv11	29-OCT-14 11:11:42AM	User Waypoint	N12 44.945 W85 15.838	448 m	12.7491	-85.264
Waypoint	Cv12	29-OCT-14 12:09:27PM	User Waypoint	N12 47.289 W85 17.955	358 m	12.7881	-85.2993
Waypoint	Cv13	29-OCT-14 12:55:56PM	User Waypoint	N12 47.344 W85 17.836	320 m	12.7891	-85.2973
Waypoint	Cv14	13-NOV-14 7:07:27AM	User Waypoint	N12 47.572 W85 19.097	303 m	12.7929	-85.3183
Waypoint	Cv15	29-OCT-14 4:01:51PM	User Waypoint	N12 47.497 W85 22.493	363 m	12.7916	-85.3749
Waypoint	Cv17	30-OCT-14 10:39:28AM	User Waypoint	N12 47.186 W85 28.295	274 m	12.7864	-85.4716
Waypoint	Cv18	30-OCT-14 11:55:29AM	User Waypoint	N12 46.975 W85 28.809	266 m	12.7829	-85.4801
Waypoint	Cv19	11-NOV-14 1:46:35PM	User Waypoint	N12 48.902 W85 28.584	296 m	12.815	-85.4764
Waypoint	Cv2	28-OCT-14 8:56:27AM	User Waypoint	N12 48.107 W85 25.650	274 m	12.8018	-85.4275
Waypoint	Cv20	03-NOV-14 2:57:38PM	User Waypoint	N12 48.759 W85 28.328	273 m	12.8126	-85.4721
Waypoint	Cv20.1	13-NOV-14 2:01:25PM	User Waypoint	N12 48.798 W85 25.669	308 m	12.8133	-85.4278
Waypoint	Cv21	04-NOV-14 8:13:25AM	User Waypoint	N13 00.185 W85 34.243	593 m	13.0031	-85.5707
Waypoint	Cv23	04-NOV-14 10:56:09AM	User Waypoint	N13 00.096 W85 33.308	484 m	13.0016	-85.5551
Waypoint	Cv25	04-NOV-14 1:30:31PM	User Waypoint	N12 57.838 W85 33.813	482 m	12.964	-85.5636
Waypoint	Cv26	04-NOV-14 2:37:07PM	User Waypoint	N12 55.913 W85 34.079	668 m	12.9319	-85.568
Waypoint	Cv29	05-NOV-14 10:00:14AM	User Waypoint	N12 58.977 W85 29.281	550 m	12.983	-85.488
Waypoint	Cv4	19-NOV-14 12:36:55PM	User Waypoint	N12 47.237 W85 18.429	318 m	12.7873	-85.3071
Waypoint	Cv5	19-NOV-14 11:40:03AM	User Waypoint	N12 47.148 W85 18.439	347 m	12.7858	-85.3073
Waypoint	Cv6	20-NOV-14 12:04:21PM	User Waypoint	N12 47.122 W85 18.629	301 m	12.7854	-85.3105
Waypoint	Cv7	20-NOV-14 9:39:08AM	User Waypoint	N12 47.048 W85 18.987	337 m	12.7841	-85.3165
Waypoint	P1	28-OCT-14 7:09:36AM	User Waypoint	N12 49.276 W85 25.982	281 m	12.8213	-85.433
Waypoint	P10.1	29-OCT-14 9:15:22AM	User Waypoint	N12 48.082 W85 18.597	329 m	12.8014	-85.31
Waypoint	P10.2	29-OCT-14 9:28:59AM	User Waypoint	N12 48.039 W85 18.586	321 m	12.8006	-85.3098
Waypoint	P10.3	18-NOV-14 12:10:10PM	User Waypoint	N12 48.093 W85 18.570	334 m	12.8016	-85.3095
Waypoint	P11.1	29-OCT-14 11:07:45AM	User Waypoint	N12 44.988 W85 15.855	443 m	12.7498	-85.2643
Waypoint	P11.2	29-OCT-14 11:19:40AM	User Waypoint	N12 44.878 W85 15.893	443 m	12.748	-85.2649
Waypoint	P12.1	29-OCT-14 12:04:58PM	User Waypoint	N12 47.287 W85 17.929	339 m	12.7881	-85.2988
Waypoint	P12.2	29-OCT-14 12:12:44PM	User Waypoint	N12 47.300 W85 17.973	373 m	12.7883	-85.2995
Waypoint	P12.3	29-OCT-14 12:25:49PM	User Waypoint	N12 47.176 W85 17.930	334 m	12.7863	-85.2988
Waypoint	P12.4	29-OCT-14 12:32:04PM	User Waypoint	N12 47.210 W85 17.872	319 m	12.7868	-85.2979
Waypoint	P13.1	29-OCT-14 12:50:13PM	User Waypoint	N12 47.317 W85 17.845	319 m	12.7886	-85.2974
Waypoint	P13.2	29-OCT-14 12:55:20PM	User Waypoint	N12 47.344 W85 17.836	320 m	12.7891	-85.2973
Waypoint	P13.3	14-NOV-14 12:07:27PM	User Waypoint	N12 47.312 W85 17.807	328 m	12.7885	-85.2968
Waypoint	P14.1	29-OCT-14 2:26:28PM	User Waypoint	N12 47.563 W85 19.080	303 m	12.7927	-85.318
Waypoint	P14.2	29-OCT-14 2:30:32PM	User Waypoint	N12 47.524 W85 19.100	307 m	12.7921	-85.3183
Waypoint	P15.1	29-OCT-14 3:40:04PM	User Waypoint	N12 47.579 W85 22.355	366 m	12.793	-85.3726
Waypoint	P15.2	12-NOV-14 12:51:02PM	User Waypoint	N12 47.461 W85 22.425	359 m	12.791	-85.3738
Waypoint	P15.3	29-OCT-14 3:57:18PM	User Waypoint	N12 47.470 W85 22.514	352 m	12.7912	-85.3752
Waypoint	P16.1	12-NOV-14 7:33:26AM	User Waypoint	N12 47.562 W85 24.942	321 m	12.7927	-85.4157
Waypoint	P16.2	30-OCT-14 9:19:53AM	User Waypoint	N12 47.526 W85 24.653	317 m	12.7921	-85.4109
Waypoint	P16.3	12-NOV-14 9:27:41AM	User Waypoint	N12 47.589 W85 24.650	314 m	12.7932	-85.4108
Waypoint	P17.1	30-OCT-14 10:26:43AM	User Waypoint	N12 47.200 W85 28.249	273 m	12.7867	-85.4708
Waypoint	P17.2	11-NOV-14 10:13:04AM	User Waypoint	N12 47.161 W85 28.181	273 m	12.786	-85.4697
Waypoint	P17.3	30-OCT-14 10:36:55AM	User Waypoint	N12 47.149 W85 28.298	269 m	12.7858	-85.4716
Waypoint	P18.1	30-OCT-14 11:11:35AM	User Waypoint	N12 46.971 W85 28.866	278 m	12.7828	-85.4811
Waypoint	P18.2	30-OCT-14 11:36:52AM	User Waypoint	N12 46.780 W85 28.760	265 m	12.7797	-85.4793
Waypoint	P19.1	30-OCT-14 1:05:00PM	User Waypoint	N12 48.862 W85 28.547	300 m	12.8144	-85.4758
Waypoint	P19.2	30-OCT-14 1:17:45PM	User Waypoint	N12 48.825 W85 28.408	300 m	12.8138	-85.4735
Waypoint	P19.3	30-OCT-14 1:16:16PM	User Waypoint	N12 48.846 W85 28.424	298 m	12.8141	-85.4737
Waypoint	P2	28-OCT-14 7:12:38AM	User Waypoint	N12 49.274 W85 25.968	281 m	12.8212	-85.4328
Waypoint	P2.1	28-OCT-14 8:37:10AM	User Waypoint	N12 48.121 W85 25.556	277 m	12.802	-85.4259
Waypoint	P2.2	28-OCT-14 8:45:09AM	User Waypoint	N12 48.152 W85 25.663	277 m	12.8025	-85.4277
Waypoint	P20.1	03-NOV-14 3:04:59PM	User Waypoint	N12 48.836 W85 28.314	281 m	12.8139	-85.4719
Waypoint	P20.11	05-NOV-14 2:22:12PM	User Waypoint	N12 48.778 W85 25.691	316 m	12.813	-85.4282
Waypoint	P20.2	05-NOV-14 2:29:58PM	User Waypoint	N12 48.781 W85 25.689	316 m	12.813	-85.4282
Waypoint	P21.1	04-NOV-14 8:05:54AM	User Waypoint	N13 00.121 W85 34.302	572 m	13.002	-85.5717
Waypoint	P21.11	04-NOV-14 8:41:36AM	User Waypoint	N13 00.087 W85 34.282	588 m	13.0015	-85.5714
Waypoint	p21.2	04-NOV-14 8:17:25AM	User Waypoint	N13 00.185 W85 34.209	597 m	13.0031	-85.5701
Waypoint	P21.3	04-NOV-14 8:33:37AM	User Waypoint	N13 00.033 W85 34.220	579 m	13.0006	-85.5703
Waypoint	P22.1Y2	04-NOV-14 9:19:59AM	User Waypoint	N13 00.542 W85 33.969	635 m	13.009	-85.5661
Waypoint	P22.3	04-NOV-14 9:36:59AM	User Waypoint	N13 00.516 W85 33.926	626 m	13.0086	-85.5654
Waypoint	P23.1	04-NOV-14 10:35:59AM	User Waypoint	N13 00.060 W85 33.249	478 m	13.001	-85.5542
Waypoint	P23.2	04-NOV-14 10:44:36AM	User Waypoint	N13 00.085 W85 33.202	495 m	13.0014	-85.5534
Waypoint	P24.1	04-NOV-14 11:51:17AM	User Waypoint	N12 59.022 W85 33.440	574 m	12.9837	-85.5573
Waypoint	P24.2	04-NOV-14 12:04:04PM	User Waypoint	N12 58.558 W85 33.576	597 m	12.976	-85.5596
Waypoint	P25.1	04-NOV-14 1:25:03PM	User Waypoint	N12 57.831 W85 33.793	480 m	12.9639	-85.5632
Waypoint	P25.2Y3	04-NOV-14 1:28:37PM	User Waypoint	N12 57.819 W85 33.816	484 m	12.9636	-85.5636
Waypoint	P26.1	04-NOV-14 2:33:43PM	User Waypoint	N12 55.948 W85 34.095	663 m	12.9325	-85.5683
Waypoint	P26.2	04-NOV-14 2:38:51PM	User Waypoint	N12 55.913 W85 34.080	670 m	12.9319	-85.568
Waypoint	P26.3	04-NOV-14 2:44:17PM	User Waypoint	N12 55.910 W85 34.014	670 m	12.9318	-85.5669
Waypoint	P27.1	05-NOV-14 7:14:37AM	User Waypoint	N12 56.761 W85 33.928	657 m	12.946	-85.5655
Waypoint	P27.2	05-NOV-14 7:21:08AM	User Waypoint	N12 56.844 W85 33.918	657 m	12.9474	-85.5653
Waypoint	P27.3	05-NOV-14 7:28:38AM	User Waypoint	N12 56.738 W85 33.934	657 m	12.9456	-85.5656
Waypoint	P28.1	05-NOV-14 8:47:26AM	User Waypoint	N12 58.664 W85 29.876	683 m	12.9777	-85.4979
Waypoint	P28.2	05-NOV-14 8:55:32AM	User Waypoint	N12 58.722 W85 29.861	673 m	12.9787	-85.4977
Waypoint	P29.1	05-NOV-14 9:40:59AM	User Waypoint	N12 58.903 W85 29.269	545 m	12.9817	-85.4878
Waypoint	P29.2Y3	05-NOV-14 9:55:47AM	User Waypoint	N12 58.951 W85 29.248	536 m	12.9825	-85.4875
Waypoint	P3	28-OCT-14 7:17:53AM	User Waypoint	N12 49.290 W85 25.873	289 m	12.8215	-85.4312
Waypoint	P3.1	13-NOV-14 9:43:15AM	User Waypoint	N12 47.729 W85 18.606	398 m	12.7955	-85.3101
Waypoint	P30.1Y2	05-NOV-14 11:24:15AM	User Waypoint	N12 59.908 W85 28.193	601 m	12.9985	-85.4699
Waypoint	P30.2	05-NOV-14 11:27:38AM	User Waypoint	N12 59.894 W85 28.260	603 m	12.9982	-85.471
Waypoint	P4.1	19-NOV-14 7:56:04AM	User Waypoint	N12 47.163 W85 18.348	352 m	12.786	-85.3058
Waypoint	p4.2	19-NOV-14 12:55:09PM	User Waypoint	N12 47.336 W85 18.528	343 m	12.7889	-85.3088
Waypoint	P5.1	19-NOV-14 11:24:23AM	User Waypoint	N12 47.109 W85 18.455	351 m	12.7851	-85.3076
Waypoint	P5.2	19-NOV-14 11:43:58AM	User Waypoint	N12 47.138 W85 18.466	349 m	12.7856	-85.3078
Waypoint	P6.1	28-OCT-14 1:09:32PM	User Waypoint	N12 47.111 W85 18.536	342 m	12.7852	-85.3089
Waypoint	P6.3	28-OCT-14 1:44:41PM	User Waypoint	N12 47.161 W85 18.648	320 m	12.786	-85.3108
Waypoint	P7.1	28-OCT-14 2:16:12PM	User Waypoint	N12 47.069 W85 18.990	308 m	12.7845	-85.3165
Waypoint	P7.2	28-OCT-14 2:18:36PM	User Waypoint	N12 47.059 W85 18.997	308 m	12.7843	-85.3166
Waypoint	P8.1	18-NOV-14 7:00:46AM	User Waypoint	N12 47.322 W85 18.261	317 m	12.7887	-85.3043
Waypoint	P8.2	18-NOV-14 8:05:49AM	User Waypoint	N12 47.348 W85 18.291	344 m	12.7891	-85.3049
Waypoint	P9.1Y2	29-OCT-14 8:05:24AM	User Waypoint	N12 47.525 W85 18.867	306 m	12.7921	-85.3144
Waypoint	P9.3	29-OCT-14 8:13:20AM	User Waypoint	N12 47.484 W85 18.951	329 m	12.7914	-85.3158
Waypoint	V1	06-NOV-14 12:27:01PM	User Waypoint	N12 49.294 W85 25.867	296 m	12.8216	-85.4311
Waypoint	V2	06-NOV-14 12:29:16PM	User Waypoint	N12 49.327 W85 25.854	300 m	12.8221	-85.4309
Waypoint	V3	06-NOV-14 12:30:16PM	User Waypoint	N12 49.339 W85 25.864	301 m	12.8223	-85.4311
Waypoint	V4	06-NOV-14 12:31:25PM	User Waypoint	N12 49.333 W85 25.885	300 m	12.8222	-85.4314
Waypoint	V5	06-NOV-14 12:33:39PM	User Waypoint	N12 49.284 W85 25.884	294 m	12.8214	-85.4314
Waypoint	V6	06-NOV-14 12:35:05PM	User Waypoint	N12 49.290 W85 25.867	296 m	12.8215	-85.4311
