# Supplementary material for: Climate-Smart Livestock Systems: An Assessment of Carbon Stocks and GHG Emissions in Nicaragua
Source: PLoS One. 2016 Dec 28;11(12):e0167949. doi: 10.1371/journal.pone.0167949 (PMC5193326; doi:10.1371/journal.pone.0167949)
Supplement: S1 Table — Accumulated carbon in pasture and trees on the five land use systems expressed in Mg C ha-1. (XLSX) [file pone.0167949.s008.xlsx]

## Sheet: Hoja1
Land use	ID	Pasture Carbon (Mg C ha-1)	Tree Carbon (Mg C ha-1)
SF	1	0.650794	26.0912
SF	2	5.87778	20.7157
SF	12	3.31429	22.7618
SF	17	2.7113	28.5894
SF	18	3.21231	49.5919
SF	21	2.28473	16.9033
SF	22	2.12815	145.014
SF	23	3.21231	63.6375
SF	26	2.28473	16.5358
IPT	1	1.01516	11.8105
IPT	4	0.540471	3.39374
IPT	5	0.805716	17.2128
IPT	6	3.60372	6.97457
IPT	7	0.474619	45.1468
IPT	12	1.04976	6.71453
IPT	13	0.492924	8.40953
IPT	14	1.05	22.8316
IPT	15	0.531614	8.42515
IPT	16	1.70146	22.2725
IPT	18	1.29319	18.6023
IPT	20	0.654131	16.526
IPT	21	1.10198	22.3451
IPT	25	1.23412	0.965611
IPT	26	0.770366	3.81063
IPT	27	0.902502	15.8312
IPT	28	0.729978	12.4769
IPT	29	0.557256	10.2655
IPT	30	0.88578	16.5642
IPT	2	1.23485	44.4945
IPT	8	1.10552	6.37277
IPT	9	0.356688	17.0313
IPT	10	0.255625	6.30982
IPT	17	0.585044	32.1782
IPT	19	4.0547	2.57666
IPT	22	0.67473	34.0578
IPT	23	0.4708	38.0129
IPT	24	0.961892	7.89092
IP	1	1.24698	0
IP	3	0.77325	0
IP	4	0.71232	0
IP	5	0.323279	0
IP	6	3.37604	0
IP	8	1.10725	0
IP	10	0.24435	0
IP	11	1.18735	0
IP	12	0.204188	0
IP	13	0.925952	0
IP	14	1.49854	0
IP	15	0.867451	0
IP	16	1.00036	0
IP	18	1.29319	0
IP	20	1.74272	0
IP	21	0.926751	0
IP	23	0.41425	0
IP	25	0.873073	0
IP	27	0.797918	0
IP	28	1.50439	0
IP	29	1.12054	0
IP	30	0.25477	0
IP	2	1.08924	0
IP	9	0.202872	0
IP	17	1.30205	0
IP	19	5.26131	0
IP	22	1.08369	0
IP	24	0.635994	0
IP	26	1.42385	0
NPT	1	7.29752	7.29752
NPT	3	1.09055	1.09055
NPT	6	8.22508	8.22508
NPT	12	7.26366	7.26366
NPT	13	10.9268	10.9268
NPT	16	8.09965	8.09965
NPT	17	18.6473	18.6473
NPT	18	7.9907	7.9907
NPT	22	2.09215	2.09215
NPT	23	1.01071	1.01071
NPT	25	7.3004	7.3004
NP	2	1.13977	0
NP	7	0.425084	0
NP	10	0.344511	0
NP	11	0.474497	0
NP	14	0.412857	0
NP	15	0.32816	0
NP	21	1.63341	0
NP	24	1.37899	0
NP	26	0.106324	0
NP	27	0.107181	0
NP	30	0.589544	0
