# Supplementary material for: Climate-Smart Livestock Systems: An Assessment of Carbon Stocks and GHG Emissions in Nicaragua
Source: PLoS One. 2016 Dec 28;11(12):e0167949. doi: 10.1371/journal.pone.0167949 (PMC5193326; doi:10.1371/journal.pone.0167949)
Supplement: S4 Fig — The emission sources are methane from enteric fermentation (CH4E.F), methane from manure residues (CH4M.R), nitrous oxide from manure residues (N2OM.R), nitrous oxide from fertilizer use (N2OF), carbon dioxide from fossil fuel (CO2F.F) and carbon dioxide from producing inputs (CO2I.P). Emissions are expressed in tonnes CO2-eq. per farm year-1. Circles indicate outliers. (CSV) [file pone.0167949.s004.csv]

Source	Emissions (tonnes CO2-eq. per farm year-1)
CH4 Enteric fermentation	2.207104893
CH4 Enteric fermentation	25.01165319
CH4 Enteric fermentation	5.199439501
CH4 Enteric fermentation	4.158033959
CH4 Enteric fermentation	2.487806064
CH4 Enteric fermentation	3.341810881
CH4 Enteric fermentation	2.325525845
CH4 Enteric fermentation	4.276471566
CH4 Enteric fermentation	5.310175157
CH4 Enteric fermentation	8.500984192
CH4 Enteric fermentation	8.87638173
CH4 Enteric fermentation	2.527059939
CH4 Enteric fermentation	6.029479011
CH4 Enteric fermentation	4.045923276
CH4 Enteric fermentation	10.66801537
CH4 Enteric fermentation	22.73374688
CH4 Enteric fermentation	9.805634061
CH4 Enteric fermentation	5.762558093
CH4 Enteric fermentation	5.61016205
CH4 Enteric fermentation	17.23976583
CH4 Enteric fermentation	6.403462383
CH4 Enteric fermentation	1.78018035
CH4 Enteric fermentation	4.305546881
CH4 Enteric fermentation	13.88648193
CH4 Enteric fermentation	5.909001526
CH4 Enteric fermentation	3.862038127
CH4 Enteric fermentation	6.55913545
CH4 Enteric fermentation	4.61522121
CH4 Enteric fermentation	7.568446209
CH4 Enteric fermentation	7.169639106
CH4 Manure residues	0.05788446
CH4 Manure residues	0.29498882
CH4 Manure residues	0.123444071
CH4 Manure residues	0.110267466
CH4 Manure residues	0.064397847
CH4 Manure residues	0.040311778
CH4 Manure residues	0.062683053
CH4 Manure residues	0.051995504
CH4 Manure residues	0.133973503
CH4 Manure residues	0.221264537
CH4 Manure residues	0.204289669
CH4 Manure residues	0.061816213
CH4 Manure residues	0.14927436
CH4 Manure residues	0.107004539
CH4 Manure residues	0.25366172
CH4 Manure residues	0.57195455
CH4 Manure residues	0.23274973
CH4 Manure residues	0.14030025
CH4 Manure residues	0.086172347
CH4 Manure residues	1.053945652
CH4 Manure residues	0.615736754
CH4 Manure residues	0.151472397
CH4 Manure residues	0.511176531
CH4 Manure residues	0.811983268
CH4 Manure residues	0.14158513
CH4 Manure residues	0.244869004
CH4 Manure residues	0.156761075
CH4 Manure residues	0.288203869
CH4 Manure residues	0.436278051
CH4 Manure residues	0.452138518
N2O Manure residues	0.693697691
N2O Manure residues	1.153541662
N2O Manure residues	1.538222403
N2O Manure residues	1.12180796
N2O Manure residues	0.55967271
N2O Manure residues	0.481734477
N2O Manure residues	0.534575335
N2O Manure residues	0
N2O Manure residues	1.475329031
N2O Manure residues	2.483190926
N2O Manure residues	2.500253642
N2O Manure residues	0.633896692
N2O Manure residues	1.536425401
N2O Manure residues	1.042192861
N2O Manure residues	2.557992709
N2O Manure residues	6.294875783
N2O Manure residues	1.409436117
N2O Manure residues	1.458775706
N2O Manure residues	0.519177196
N2O Manure residues	4.372521818
N2O Manure residues	1.141215033
N2O Manure residues	0.344373288
N2O Manure residues	0.277903415
N2O Manure residues	3.362451585
N2O Manure residues	1.624805971
N2O Manure residues	1.084249837
N2O Manure residues	1.857216314
N2O Manure residues	1.258861726
N2O Manure residues	1.882010912
N2O Manure residues	1.955348812
N2O Fertilizer	1
N2O Fertilizer	1
N2O Fertilizer	3
N2O Fertilizer	0.2
N2O Fertilizer	8.9
N2O Fertilizer	0.4
N2O Fertilizer	1.6
N2O Fertilizer	1.6
N2O Fertilizer	0.7
N2O Fertilizer	4.7
N2O Fertilizer	5.8
N2O Fertilizer	5.8
N2O Fertilizer	0.2
N2O Fertilizer	3.7
N2O Fertilizer	6.8
N2O Fertilizer	6.5
N2O Fertilizer	0.2
N2O Fertilizer	0.1
CO2 Fossil fuel	0.2
CO2 Fossil fuel	3.7
CO2 Fossil fuel	0.7
CO2 Fossil fuel	0.4
CO2 Fossil fuel	0.1
CO2 Fossil fuel	0.8
CO2 Fossil fuel	1
CO2 Fossil fuel	0.2
CO2 Fossil fuel	0.13
CO2 Fossil fuel	0.2
CO2 Fossil fuel	0.3
CO2 Fossil fuel	9.5
CO2 Fossil fuel	0.4
CO2 Fossil fuel	0.4
CO2 Fossil fuel	0.4
CO2 Fossil fuel	2.1
CO2 Fossil fuel	1.9
CO2 Fossil fuel	1.9
CO2 Fossil fuel	1.6
CO2 Fossil fuel	1
CO2 Fossil fuel	0.2
CO2 Fossil fuel	0.18
CO2 Fossil fuel	0.4
CO2 Fossil fuel	0.3
CO2 Fossil fuel	0.7
CO2 Input production	6.2
CO2 Input production	0.4
CO2 Input production	3
CO2 Input production	0.3
CO2 Input production	0.3
CO2 Input production	0.6
CO2 Input production	0.2
CO2 Input production	0.2
CO2 Input production	0.1
CO2 Input production	1.8
CO2 Input production	1.1
CO2 Input production	1.3
CO2 Input production	0.3
CO2 Input production	1.6
CO2 Input production	1.4
CO2 Input production	0.3
CO2 Input production	1.5
CO2 Input production	1.2
CO2 Input production	1.4
CO2 Input production	0.6
CO2 Input production	0.3
CO2 Input production	0.6
CO2 Input production	0.9
CO2 Input production	0.7
CO2 Input production	0.6
