# Supplementary material for: Climate-Smart Livestock Systems: An Assessment of Carbon Stocks and GHG Emissions in Nicaragua
Source: PLoS One. 2016 Dec 28;11(12):e0167949. doi: 10.1371/journal.pone.0167949 (PMC5193326; doi:10.1371/journal.pone.0167949)
Supplement: S5 Fig — Sources are the sum of methane from enteric fermentation, and methane and nitrous oxide from manure. The animal categories are lactating cow, calf, heifer > 2 years (H > 2), bull, heifer 1–2 years (H1-2) and dry cow. Circles indicate outliers. (XLSX) [file pone.0167949.s005.xlsx]

## Sheet: Sheet1
Category	Emissions (CH4 enteric fermentation and manure NO2 manure) in kg CO2-eq. kg FPCM-1
Lacting cow	1.97513
Lacting cow	1.80598
Lacting cow	1.97513
Lacting cow	1.58112
Lacting cow	1.84699
Lacting cow	1.82116
Lacting cow	1.82756
Lacting cow	1.94184
Lacting cow	1.86951
Lacting cow	1.86951
Lacting cow	1.62282
Lacting cow	1.9174
Lacting cow	1.64063
Lacting cow	1.86669
Lacting cow	1.85716
Lacting cow	1.88597
Lacting cow	1.85716
Lacting cow	1.86669
Lacting cow	1.86055
Lacting cow	1.9174
Dry cow	1.25088
Dry cow	0.797936
Dry cow	1.11915
Dry cow	1.25088
Dry cow	0.98901
Dry cow	1.19478
Dry cow	0.837496
Dry cow	1.19282
Dry cow	1.19282
Dry cow	1.09508
Dry cow	1.15336
Dry cow	1.15336
Dry cow	1.23685
Dry cow	1.16631
Dry cow	1.17039
Dry cow	0.967239
Dry cow	1.17039
Dry cow	1.01616
Dry cow	1.19942
Dry cow	1.04987
Dry cow	1.11157
Dry cow	0.949992
Dry cow	1.15597
Dry cow	1.14812
Dry cow	1.17976
Dry cow	1.14812
Dry cow	1.16066
Dry cow	1.19942
Heifer 1-2	1.21566
Heifer 1-2	0.780613
Heifer 1-2	1.06809
Heifer 1-2	1.02689
Heifer 1-2	0.780613
Heifer 1-2	1.00376
Heifer 1-2	0.9586
Heifer 1-2	1.10367
Heifer 1-2	0.972242
Heifer 1-2	0.918396
Heifer 1-2	1.1794
Heifer 1-2	0.976279
Heifer 1-2	0.971506
Heifer 1-2	1.13922
Heifer 1-2	0.808424
Heifer 1-2	0.961433
Heifer 1-2	1.02576
Heifer 1-2	1.34148
Heifer 1-2	1.07087
Heifer >2	1.32126
Heifer >2	1.34125
Heifer >2	1.12743
Heifer >2	1.1114
Heifer >2	0.931684
Heifer >2	1.07688
Heifer >2	0.832686
Heifer >2	1.25079
Heifer >2	1.23395
Heifer >2	1.23395
Heifer >2	1.11479
Heifer >2	1.31101
Heifer >2	1.07578
Heifer >2	1.04593
Heifer >2	0.960206
Heifer >2	1.25008
Heifer >2	1.07152
Heifer >2	1.02003
Heifer >2	1.05395
Heifer >2	1.18872
Heifer >2	1.59841
Heifer >2	1.25008
Calves	0.836116
Calves	0.865678
Calves	0.888774
Calves	0.841887
Calves	0.793695
Calves	0.745251
Calves	0.918497
Calves	0.927568
Calves	0.796164
Calves	0.823862
Calves	0.75837
Calves	0.861461
Calves	0.823862
Calves	0.929304
Calves	0.803457
Calves	1.0043
Calves	0.891624
Calves	0.903804
Calves	0.734347
Calves	0.735527
Calves	0.730301
Calves	1.02585
Calves	0.726195
Calves	0.688462
Calves	0.801105
Calves	0.823946
Calves	0.991972
Calves	0.870149
Bull	1.71466
Bull	1.10315
Bull	1.68008
Bull	1.86466
Bull	1.6189
Bull	1.25192
Bull	1.67666
Bull	1.26206
Bull	1.64804
Bull	1.59863
Bull	1.46497
Bull	1.50301
Bull	1.56481
Bull	1.79726
Bull	1.785
Bull	1.64958
Bull	1.22701
Bull	1.46026
Bull	1.41509
Bull	1.7681
Bull	1.38273
Bull	1.57148
Bull	1.27827
Bull	1.6431
Bull	1.43546
Bull	1.55296
Bull	1.60919
Bull	1.78578
Bull	1.77893
Bull	1.50958
