# Supplementary material for: Climate-Smart Livestock Systems: An Assessment of Carbon Stocks and GHG Emissions in Nicaragua
Source: PLoS One. 2016 Dec 28;11(12):e0167949. doi: 10.1371/journal.pone.0167949 (PMC5193326; doi:10.1371/journal.pone.0167949)
Supplement: S6 Fig — Sources are methane from enteric fermentation (CH4E.F), methane from manure (CH4M.R) and nitrous oxide from manure (N2OM.R). (CSV) [file pone.0167949.s006.csv]

Source	Season	Emissions (kg CO2-eq.kg FPCM-1 )
CH4FE	Dry	0.916219012
CH4FE	Dry	0.916219012
CH4FE	Dry	0.916219012
CH4FE	Dry	0.916219012
CH4FE	Dry	0.916219012
CH4FE	Dry	0.916219012
CH4FE	Dry	0.580545208
CH4FE	Dry	0.220244516
CH4FE	Dry	0.916219012
CH4FE	Dry	0.916219012
CH4FE	Dry	0.493904449
CH4FE	Dry	0.916219012
CH4FE	Dry	0.404751467
CH4FE	Dry	0.350788499
CH4FE	Dry	0.592285546
CH4FE	Dry	0.543817839
CH4FE	Dry	0.885877669
CH4FE	Dry	0.712322619
CH4FE	Dry	0.916219012
CH4FE	Dry	0.916219012
CH4FE	Dry	0.873713765
CH4FE	Dry	0.916219012
CH4FE	Dry	0.916219012
CH4FE	Dry	0.916219012
CH4FE	Dry	0.916219012
CH4FE	Dry	0.916219012
CH4FE	Dry	0.268792717
CH4FE	Dry	0.182562544
CH4FE	Dry	0.154858507
CH4FE	Dry	0.29267778
CH4MR	Dry	0.047722293
CH4MR	Dry	0.048686869
CH4MR	Dry	0.048711644
CH4MR	Dry	0.048711644
CH4MR	Dry	0.048711644
CH4MR	Dry	0.048711644
CH4MR	Dry	0.048711644
CH4MR	Dry	0.048711644
CH4MR	Dry	0.048711644
CH4MR	Dry	0.048711644
CH4MR	Dry	0.048711644
CH4MR	Dry	0.046852601
CH4MR	Dry	0.046462371
CH4MR	Dry	0.048711644
CH4MR	Dry	0.048711644
CH4MR	Dry	0.048711644
CH4MR	Dry	0.048711644
CH4MR	Dry	0.048711644
CH4MR	Dry	0.048711644
CH4MR	Dry	0.047144749
CH4MR	Dry	0.046711008
CH4MR	Dry	0.046578177
CH4MR	Dry	0.045816722
CH4MR	Dry	0.044040865
CH4MR	Dry	0.042837096
CH4MR	Dry	0.044508864
CH4MR	Dry	0.034170639
CH4MR	Dry	0.028111123
CH4MR	Dry	0.020353918
CH4MR	Dry	0.017629013
N20MR	Dry	0.428112583
N20MR	Dry	0.452147891
N20MR	Dry	0.452147891
N20MR	Dry	0.452147891
N20MR	Dry	0.452147891
N20MR	Dry	0.452147891
N20MR	Dry	0.452147891
N20MR	Dry	0.452147891
N20MR	Dry	0.452147891
N20MR	Dry	0.452147891
N20MR	Dry	0.452147891
N20MR	Dry	0.426021935
N20MR	Dry	0.43092197
N20MR	Dry	0.452147891
N20MR	Dry	0.452147891
N20MR	Dry	0.452147891
N20MR	Dry	0.452147891
N20MR	Dry	0.452147891
N20MR	Dry	0.452147891
N20MR	Dry	0.452147891
N20MR	Dry	0.452147891
N20MR	Dry	0.449355676
N20MR	Dry	0.443635239
N20MR	Dry	0.42459747
N20MR	Dry	0.412677142
N20MR	Dry	0.425520203
N20MR	Dry	0.32864983
N20MR	Dry	0.275011885
N20MR	Dry	0.198196091
N20MR	Dry	0.175159072
