# Supplementary material for: Climate-Smart Livestock Systems: An Assessment of Carbon Stocks and GHG Emissions in Nicaragua
Source: PLoS One. 2016 Dec 28;11(12):e0167949. doi: 10.1371/journal.pone.0167949 (PMC5193326; doi:10.1371/journal.pone.0167949)
Supplement: S7 Fig — Sources are methane from enteric fermentation (CH4E.F), methane from manure (CH4M.R) and nitrous oxide from manure (N2OM.R). (CSV) [file pone.0167949.s007.csv]

Source	Season	Emissions (kg CO2-eq.kg FPCM-1 )
CH4FE	Rainy	0.67743603
CH4FE	Rainy	0.67743603
CH4FE	Rainy	0.67743603
CH4FE	Rainy	0.67743603
CH4FE	Rainy	0.67743603
CH4FE	Rainy	0.67743603
CH4FE	Rainy	0.67743603
CH4FE	Rainy	0.461253347
CH4FE	Rainy	0.67743603
CH4FE	Rainy	0.394855163
CH4FE	Rainy	0.43972689
CH4FE	Rainy	0.67743603
CH4FE	Rainy	0.319022545
CH4FE	Rainy	0.226867852
CH4FE	Rainy	0.426012647
CH4FE	Rainy	0.67743603
CH4FE	Rainy	0.67743603
CH4FE	Rainy	0.448327705
CH4FE	Rainy	0.673270233
CH4FE	Rainy	0.67743603
CH4FE	Rainy	0.532291633
CH4FE	Rainy	0.67743603
CH4FE	Rainy	0.663475611
CH4FE	Rainy	0.67743603
CH4FE	Rainy	0.660578726
CH4FE	Rainy	0.67743603
CH4FE	Rainy	0.32689517
CH4FE	Rainy	0.112523072
CH4FE	Rainy	0.141051309
CH4FE	Rainy	0.204894056
CH4MR	Rainy	0.026679931
CH4MR	Rainy	0.027634408
CH4MR	Rainy	0.029910297
CH4MR	Rainy	0.029816114
CH4MR	Rainy	0.029910297
CH4MR	Rainy	0.029910297
CH4MR	Rainy	0.029910297
CH4MR	Rainy	0.029910297
CH4MR	Rainy	0.029910297
CH4MR	Rainy	0.029910297
CH4MR	Rainy	0.029910297
CH4MR	Rainy	0.028381516
CH4MR	Rainy	0.025312861
CH4MR	Rainy	0.029051828
CH4MR	Rainy	0.029910297
CH4MR	Rainy	0.029910297
CH4MR	Rainy	0.029910297
CH4MR	Rainy	0.029910297
CH4MR	Rainy	0.028166347
CH4MR	Rainy	0.027187462
CH4MR	Rainy	0.029910297
CH4MR	Rainy	0.029910297
CH4MR	Rainy	0.029910297
CH4MR	Rainy	0.029910297
CH4MR	Rainy	0.029910297
CH4MR	Rainy	0.029910297
CH4MR	Rainy	0.029215714
CH4MR	Rainy	0.024828276
CH4MR	Rainy	0.01828536
CH4MR	Rainy	0.016233249
N20MR	Rainy	0.364675442
N20MR	Rainy	0.39721704
N20MR	Rainy	0.419567565
N20MR	Rainy	0.396152846
N20MR	Rainy	0.419567565
N20MR	Rainy	0.419567565
N20MR	Rainy	0.419567565
N20MR	Rainy	0.419567565
N20MR	Rainy	0.419567565
N20MR	Rainy	0.419567565
N20MR	Rainy	0.416592022
N20MR	Rainy	0.36980341
N20MR	Rainy	0.340906722
N20MR	Rainy	0.390414646
N20MR	Rainy	0.409182227
N20MR	Rainy	0.419017143
N20MR	Rainy	0.419567565
N20MR	Rainy	0.419567565
N20MR	Rainy	0.409316649
N20MR	Rainy	0.406091593
N20MR	Rainy	0.419567565
N20MR	Rainy	0.419567565
N20MR	Rainy	0.419567565
N20MR	Rainy	0.419567565
N20MR	Rainy	0.419567565
N20MR	Rainy	0.419567565
N20MR	Rainy	0.419567565
N20MR	Rainy	0.393034656
N20MR	Rainy	0.298508688
N20MR	Rainy	0.267969431
